# Supplementary material
Source: HighWire-hosted journal article supplement (https://bmjopen.bmj.com/content/9/5/e028441)
Supplement: inline-supplementary-material-1 [file inline-supplementary-material-1.pdf]

### Medline search strategy

1. ((caregiver\* or carer\* or "care partner" or "care partners" or "care provider" or "care providers") adj5 (program\* or intervention or educat\* or support\* or therap\* or respite\* or psychosocial or evaluat\* or "case management" or counsel\* or service\*)).tw.
2. caregivers/
3. (program\* or intervention\* or education\* or resource? or "social support" or respite).mp. or "case management".tw.
4. health communication/ or exp community health services/ or health services for the aged/ or early medical intervention/
5. exp social support/
6. RESPITE CARE/
7. Case Management/
8. PSYCHOSOCIAL SUPPORT SYSTEMS/
9. exp psychotherapy/
10. Program Development/ or Program Evaluation/
11. 3 or 4 or 5 or 6 or 7 or 8 or 9 or 10
12. 2 and 11
13. dement\*.mp.
14. alzheimer\*.mp.
15. (lewy\* adj2 bod\*).mp.
16. (creutzfeldt or jcd or cjd).mp.
17. (pick\* adj2 disease).mp.
18. ((semantic or vascular or fronto-temporal\* or Parkinson\*) adj2 dementia).mp.
19. huntington\*.mp.
20. primary progressive aphasia?.mp.
21. exp dementia/
22. "mild cognitive impairment".mp.
23. MCI.mp.
24. 13 or 14 or 15 or 16 or 17 or 18 or 19 or 20 or 21 or 22 or 23
25. 1 or 12

26. 24 and 25

No restrictions were placed on this search.
