# Supplementary material
Source: HighWire-hosted journal article supplement (https://bmjopen.bmj.com/content/9/5/e028441)
Supplement: inline-supplementary-material-2 [file inline-supplementary-material-2.pdf]

## **Data Extraction Form**

### **General Study Information**

Author/s:

Year:

Title of the article:

Funding source:

Geographic location (country):

### **Intervention Characteristics**

Classified as “early intervention” based on:

Name of intervention:

Brief description of intervention:

Type of intervention:

*(Psychosocial, cognitive-behavioural, counseling,  
case management, respite, support, multi-component)*

Type of intervention specified in article or during extraction:

Theoretical basis of intervention:

Length of intervention:

Intervention setting for delivery:

### **Study Characteristics:**

Objectives:

Design:

Design specified in article or during extraction:

Recruitment procedures:

Inclusion criteria:

Exclusion criteria:

Comparator group/s:

Sample size of main intervention group:  
(*actually measured*)

Sample size of comparator group/s:  
(*actually measured*)

**Participant Characteristics (for total sample; repeat for intervention and comparator groups if possible)**

**Caregivers:**

Definition of “caregiver”:

Geographic location:  
(*rural/urban; frequencies*)

Caregiver sex:  
(*frequencies*)

Relationship of caregiver to care recipient:  
(*frequencies*)

*Time spent caregiving (record both time in months/years and time per week/day)*  
(*mean*)

*Primary caregiver status reported? (Yes/no)*  
(*frequencies if available*)

*Lives in same dwelling as care recipient*  
(*frequencies*)

**Care recipients:**

Geographic location:  
(*rural/urban; frequencies*)

Care recipient sex:  
(*frequencies*)

Type of dementia:  
(*frequencies*)

*Co-morbidities:*  
*(frequencies or mean)*

Type of cognitive testing scores and reported mean or category:

### **Outcome Information:**

#### **For EACH relevant measurement of intervention effect:**

Construct measured:

Length of time after intervention before first follow-up:

Additional follow up measurements:  
*(time)*

Measurement tool:

Statistical techniques used for analysis:

Raw mean and standard deviation at each measurement point, intervention group:  
*(frequencies if applicable)*

Raw mean and standard deviation at each measurement point, comparator:  
*(frequencies if applicable)*

Change scores (if applicable), intervention group:

Change scores (if applicable), comparator group:

Statistical outcome/s:  
*(include p-value)*

Confidence intervals:

Effect size:  
*(reported or calculated standardized mean difference)*

#### **Comparison between the effect of early and later intervention:**

Timing of intervention, “early” group:

Timing of intervention, “later” group:

Outcome measured:

Measurement tool:

Statistical techniques used for analysis:

Raw mean and standard deviation at each measurement point, early group:  
(frequencies if applicable)

Raw mean and standard deviation at each measurement point, later group/s:  
(frequencies if applicable)

Change scores, early group (if applicable):

Change scores, later group:

Statistical outcome/s of comparisons:  
(include p-value)

Confidence intervals:

Effect size:  
(reported or calculated standardized mean difference)

**For EACH comparison of intervention effect between subgroups of caregivers**

Care recipient or caregiver characteristic examined:

Construct measured:

Measurement tool:

Statistical techniques used for analysis:

Raw mean and standard deviation at each measurement point,  
group 1 (repeat for each group being compared):  
(frequencies if applicable)

Change scores, group 1 (repeat for each group being compared):

Statistical outcome/s of comparisons:  
(include p-value)

Confidence intervals:

Effect size:

*(reported or calculated standardized mean difference)*

**Additional outcomes assessed (*i.e.*, not measures of wellbeing or ability to provide care. List/describe):**

**Other information of interest to this review:**
